# Supplementary material for: Recombinant BCG-LTAK63 Vaccine Candidate for Tuberculosis Induces an Inflammatory Profile in Human Macrophages
Source: Vaccines (Basel). 2022 May 24;10(6):831. doi: 10.3390/vaccines10060831 (PMC9227035; doi:10.3390/vaccines10060831)
Supplement: Supplementary file 1 [file vaccines-10-00831-s001.zip › Supplementary Table S1.xlsx]

## Sheet: Planilha1
Supplementary Table S1. Statistical analysis of expression of all genes evaluated by dcRT-MLPA in M1 macrophages in response to infection with rBCG-LTAK63, BCG or Mtb H37Rv compared to uninfected macrophages.
	M1 macrophages - 24 h post-infection			M1 macrophages - 48 h post-infection
Gene	rBCG-LTAK63 (p.value)	BCG (p.value)	MTBH37Rv (p.value)	rBCG-LTAK63 (p.value)	BCG (p.value)	MTBH37Rv (p.value)
SOCS1	0.12	0.45	0.8	0.45	0.8	0.12
IFI35	0.02	0.04	0.0	0.04	0.0	0.02
CD274	0.03	0.02	0.0	0.02	0.0	0.03
GBP2	0.01	0.06	0.0	0.06	0.0	0.01
IFI44	0.07	0.07	0.01	0.07	0.01	0.07
IFIT3	0.06	0.02	0.0	0.02	0.0	0.06
CXCL10	NA	NA	NA	NA	NA	NA
IFIT5	0.09	0.09	0.01	0.09	0.01	0.09
GBP5	0.01	0.18	0.0	0.18	0.0	0.01
IL7R	0.0	0.08	0.05	0.08	0.05	0.0
OAS1	0.37	0.4	0.18	0.4	0.18	0.37
IFIH1	0.2	0.18	0.06	0.18	0.06	0.2
IFI44L	0.04	0.05	0.01	0.05	0.01	0.04
IFITM3	0.02	0.05	0.01	0.05	0.01	0.02
OAS3	0.07	0.09	0.01	0.01	0.09	0.07
IRF7	0.3	0.39	0.2	0.39	0.2	0.3
STAT1	0.01	0.0	0.0	0.0	0.0	0.01
STAT2	0.02	0.0	0.01	0.0	0.01	0.02
TAP1	0.01	0.0	0.0	0.0	0.0	0.01
TAP2	0.12	0.27	0.06	0.27	0.06	0.12
GBP1	0.01	0.03	0.0	0.03	0.0	0.01
FCGR1A	0.01	0.06	0.02	0.06	0.02	0.01
CCL3	0.01	0.01	0.0	0.01	0.0	0.01
ASAP1	0.01	0.07	0.1	0.07	0.1	0.01
HCK	0.02	0.02	0.39	0.02	0.39	0.02
BMP6	0.73	0.87	0.34	0.87	0.34	0.73
CXCL9	0.01	0.01	0.08	0.01	0.08	0.01
KIF1B	0.99	0.99	0.11	0.99	0.11	0.99
CCL11	0.38	0.41	0.67	0.41	0.67	0.38
CX3CL1	NA	NA	NA	NA	NA	NA
IL6	0.27	0.35	0.74	0.35	0.74	0.27
CD14	0.46	0.89	0.0	0.89	0.0	0.46
IL12B	0.26	0.52	0.89	0.52	0.89	0.26
INDO	0.0	0.03	0.01	0.03	0.01	0.0
LYN	0.14	0.07	0.0	0.07	0.0	0.14
CCL4	0.01	0.01	0.0	0.01	0.0	0.01
SLAMF7	0.02	0.03	0.0	0.03	0.0	0.02
TNIP1	0.0	0.0	0.02	0.0	0.02	0.0
IFI16	0.75	0.22	0.99	0.22	0.99	0.75
IFIT2	0.1	0.02	0.01	0.02	0.01	0.1
OAS2	0.01	0.02	0.0	0.02	0.0	0.01
VEGF	0.12	0.16	0.19	0.16	0.19	0.12
IFI6	0.03	0.01	0.01	0.01	0.01	0.03
