# Supplementary material for: Recombinant BCG-LTAK63 Vaccine Candidate for Tuberculosis Induces an Inflammatory Profile in Human Macrophages
Source: Vaccines (Basel). 2022 May 24;10(6):831. doi: 10.3390/vaccines10060831 (PMC9227035; doi:10.3390/vaccines10060831)
Supplement: Supplementary file 1 [file vaccines-10-00831-s001.zip › Supplementary Table S2.xlsx]

## Sheet: Planilha1
Supplementary Table S2. Statistical analysis of expression of all genes evaluated by dcRT-MLPA in M2 macrophages in response to infection with rBCG-LTAK63, BCG or Mtb H37Rv compared to uninfected macrophages.
	M2 macrophages - 24 h post-infection			M2 macrophages - 48 h post-infection
Gene	rBCG-LTAK63 (p.value)	BCG (p.value)	MTBH37Rv (p.value)	rBCG-LTAK63 (p.value)	BCG (p.value)	MTBH37Rv (p.value)
SOCS1	0.75	0.61	0.7	0.39	0.01	0.72
IFI35	0.18	0.39	0.56	0.02	0.06	0.07
CD274	0.43	0.86	0.67	0.08	0.02	0.87
GBP2	0.51	0.22	0.36	0.93	0.12	0.19
IFI44	0.27	0.13	0.11	0.48	0.96	0.59
IFIT3	0.31	0.53	0.54	0.13	0.18	NA
CXCL10	0.14	0.99	0.39	0.34	0.39	0.6
IFIT5	0.73	0.86	0.87	0.12	0.01	0.78
GBP5	NA	NA	NA	NA	NA	NA
IL7R	0.07	0.74	0.75	0.01	0.03	0.11
OAS1	0.13	0.61	0.7	0.07	0.0	0.75
IFIH1	0.12	0.65	0.51	0.06	0.0	0.67
IFI44L	0.56	0.85	0.39	0.06	NA	0.39
IFITM3	0.17	0.62	0.39	0.09	0.28	0.23
OAS3	0.39	0.39	0.97	0.39	NA	NA
IRF7	0.8	0.39	0.39	0.39	NA	NA
STAT1	0.41	0.44	0.16	0.22	0.34	0.19
STAT2	0.34	0.39	0.39	0.15	0.39	NA
TAP1	0.07	0.83	0.87	0.09	0.19	0.39
TAP2	NA	NA	NA	0.39	NA	NA
GBP1	0.16	0.39	0.85	0.09	0.39	0.39
FCGR1A	NA	NA	NA	NA	NA	NA
CCL3	0.08	0.01	0.6	0.05	0.15	0.02
ASAP1	0.05	0.06	0.08	0.65	0.57	0.7
HCK	0.08	0.3	0.77	0.01	0.0	0.23
BMP6	0.1	0.66	0.76	0.1	0.01	0.51
CXCL9	0.17	0.61	0.81	0.09	0.01	0.73
KIF1B	0.0	0.12	0.23	0.03	0.04	0.4
CCL11	0.33	0.73	0.89	0.3	0.04	0.57
CX3CL1	0.27	0.36	0.85	0.45	0.08	0.78
IL6	0.64	0.55	0.68	0.01	0.0	0.49
CD14	0.43	0.8	0.89	0.08	0.03	0.61
IL12B	0.17	0.71	0.81	0.09	0.06	0.43
INDO	0.07	0.1	0.73	0.0	0.0	0.34
LYN	0.31	0.3	0.54	0.0	0.0	0.34
CCL4	0.07	0.08	0.35	0.04	0.16	0.01
SLAMF7	0.64	0.39	0.1	0.18	0.03	0.34
TNIP1	0.09	0.06	0.78	0.09	0.17	0.9
IFI16	0.09	0.77	0.73	0.09	0.01	0.97
IFIT2	0.49	0.07	0.07	0.77	0.18	0.19
OAS2	0.16	0.21	0.86	0.1	0.15	0.12
VEGF	0.16	0.07	0.47	0.09	0.1	0.07
IFI6	0.5	0.1	0.45	0.19	0.89	0.1
